1 **The post-COVID-19 population has a high prevalence of crossreactive antibodies to spikes**  
2 **from all *Orthocoronavirinae* genera**

3  
4 Gagandeep Singh<sup>1,2</sup>, Anass Abbad<sup>1,2</sup>, Giulio Kleiner<sup>1,2</sup>, Komal Srivastava<sup>1,2</sup>, Charles Gleason<sup>1,2</sup>, PARIS Study  
5 Group<sup>1,2</sup>, Juan Manuel Carreño<sup>1,2</sup>, Viviana Simon<sup>1,2,3,4,5</sup> and Florian Krammer<sup>1,2,3\*</sup>

6  
7 <sup>1</sup>*Department of Microbiology, Icahn School of Medicine at Mount Sinai, New York, NY, USA*

8 <sup>2</sup>*Center for Vaccine Research and Pandemic Preparedness (C-VaRPP), Icahn School of Medicine at Mount*  
9 *Sinai, New York, NY, USA*

10 <sup>3</sup>*Department of Pathology, Molecular and Cell-Based Medicine, Icahn School of Medicine at Mount Sinai,*  
11 *New York, NY, USA*

12 <sup>4</sup>*Division of Infectious Diseases, Department of Medicine, Icahn School of Medicine at Mount Sinai, New*  
13 *York, NY, USA*

14 <sup>5</sup>*The Global Health and Emerging Pathogens Institute, Icahn School of Medicine at Mount Sinai, New York,*  
15 *NY, USA*

16 \*To whom correspondence should be addressed: [florian.krammer@mssm.edu](mailto:florian.krammer@mssm.edu)

17  
18 #PARIS Study Group (alphabetical order): Dalles Andre, Maria C Bermúdez-González, Dominika  
19 Bielak, Gianna Cai, Christian Cognigni, Yuexing Chen, Miriam Fried, Hyun Min Kang, Neko Lyttle, Jacob  
20 Mauldin, Brian Monahan, Sara Morris, Jessica Nardulli, Annika Oostenink, Ashley-Beathrese Salimbangon,  
21 Leeba Sullivan, Morgan Van Kesteren, Temima Yellin

22  
23 **Keywords:** SARS-CoV-2 immunity, antibodies, cross-reactivity, Orthocoronaviridae

24 **Abstract**

25 The Orthocoronaviridae subfamily is large comprising four highly divergent genera. Four seasonal  
26 coronaviruses were circulating in humans prior to the coronavirus disease 2019 (COVID-19) pandemic.  
27 Infection with these viruses induced antibody responses that are relatively narrow with little cross-  
28 reactivity to spike proteins of other coronaviruses. Here, we report that infection with and vaccination  
29 against severe acute respiratory syndrome coronavirus 2 (SARS-CoV-2) induces broadly crossreactive  
30 binding antibodies to spikes from a wide range of coronaviruses including members of the sarbecovirus  
31 subgenus, betacoronaviruses including Middle Eastern respiratory syndrome coronavirus (MERS CoV),  
32 and extending to alpha-, gamma- and delta-coronavirus spikes. These data show that the coronavirus  
33 spike antibody landscape in humans has profoundly been changed and broadened as a result of the SARS-  
34 CoV-2 pandemic. While we do not understand the functionality of these crossreactive antibodies, they  
35 may lead to enhanced resistance of the population to infection with newly emerging coronaviruses with  
36 pandemic potential.

37

## 38 Main text

39 Severe acute respiratory syndrome coronavirus 2 (SARS-CoV-2) infections and vaccinations induce binding  
40 and neutralizing antibodies to the spike protein of this new virus in humans [1, 2]. Initially, these responses  
41 led to protection from symptomatic disease as shown in a number of clinical trials. However, with the  
42 emergence of variants of concern, especially Omicron and its sub-variants, protection against  
43 symptomatic disease decreased since these new variants escaped the neutralizing antibody response  
44 induced by spike proteins from the ancestral SARS-CoV-2. However, it has been reported that binding  
45 antibody to spike protein are much better maintained against the variants as compared to neutralizing  
46 activity [3]. These binding antibodies may – in addition to T-cell immunity – contribute to the mostly  
47 maintained protection from severe disease [4].

48 Here, we wanted to explore how cross-reactive antibodies induced by SARS-CoV-2 infection or vaccination  
49 bind beyond the spike protein of SARS-CoV-2 and its variants. We expressed a panel of coronavirus spikes  
50 representative of all *Orthocoronavirinae* genera. We generated 21 recombinant spikes representing the  
51 five betacoronavirus ( $\beta$ -CoV) subgenera (sarbecoviruses, hibecoviruses, merbecoviruses, nobecoviruses  
52 and embecoviruses) as well the alphacoronavirus ( $\alpha$ -CoV), gammacoronavirus ( $\gamma$ -CoV) and  
53 deltacoronavirus ( $\delta$ -CoV) genera (**Figure 1A** and **Supplementary Table 1**). Using an established enzyme-  
54 linked immunosorbent assay (ELISA) [5], we tested longitudinal sera from 10 individuals who received the  
55 mRNA coronavirus disease 2019 (COVID-19) vaccine and from 10 individuals who received the vaccine  
56 after an initial SARS-CoV-2 infection (**Supplementary Table 2**). Sera were taken before vaccination, post-  
57 1<sup>st</sup> dose (range 16-25 days for the vaccine-only group and 15-23 days for the infection-vaccination group)  
58 and post-2<sup>nd</sup> dose (range 14-28 days for the vaccine-only group and 16-29 days for the infection-  
59 vaccination group). Binding to SARS-CoV-2 ancestral and variant spikes was induced by vaccination as  
60 expected and was detectable before vaccination in people with pre-existing immunity (**Figure 1B-D**).  
61 Comparable binding was found for the SARS-CoV-1 spike and titers were also high against three other  
62 non-SARS-CoV-2 sarbecovirus spikes tested (**Figure 1E-H**). In addition, an increase in binding was detected  
63 to a hibecovirus spike and merbecovirus spikes although at a lower level (**Figure 1I** and **L-O**). COVID-19  
64 vaccine-associated increases were only detected for one of the two nobecovirus spikes tested (**Figure 1J**  
65 and **K**) but reactivity to embecoviruses was induced to some degree (**Figure 1P-R**) and – as expected –  
66 higher at pre-vaccination baseline since two of the spikes tested are from embecoviruses circulating in  
67 humans (OC43 and HKU1). No increase in reactivity was detected against the seasonal  $\alpha$ -CoV spikes but  
68 pre-vaccination baseline titers to 229E spike were detectable while reactivity to NL63 spike was much  
69 lower (**Figure 1S** and **T**). Interestingly, there was also an induction of antibodies to the  $\gamma$ -CoV spike of  
70 HKU15 but not to the  $\delta$ -CoV of HKU22 (**Figure 1U** and **V**). In general, most SARS-CoV-2 infected individuals  
71 already had titers to these spikes even before they got vaccinated. These data suggested that SARS-CoV-  
72 2 infection and vaccination can induce cross-reactive anti-spike antibodies.

73 We next investigated how different immune histories influence pan-coronavirus seroreactivity. We tested  
74 sera from different exposure groups including pre-pandemic samples (n=15, collected between 2018-  
75 2019), samples from convalescent individuals (n=16, collected at 23-87 days post infection), individuals  
76 who got two doses of COVID-19 mRNA vaccines (n=20, range of 14-36 days post-2<sup>nd</sup> dose), individuals who  
77 got three doses of COVID-19 mRNA vaccines (n=20, range of 14-33 days post-3<sup>rd</sup> dose), individuals who  
78 were infected and then got two doses of COVID-19 mRNA vaccines (n=20, range of 15-39 days post-2<sup>nd</sup>  
79 dose) and individuals who got infected and three doses of COVID-19 mRNA vaccines (n=9, range of 14-30  
80 days post-3<sup>rd</sup> dose). More information regarding the specific samples can be found in **Supplementary**  
81 **Table 3**. Analysis of pre-pandemic sera showed reactivity to the  $\beta$ -CoV spikes from two human seasonal  
82 coronaviruses, OC43 and HKU1. Interestingly, there was also strong reactivity, comparable to OC43, to  
83 the spike of the bovine coronavirus (BCoV) with sera from all study participants having reactivity above

84 the limit of detection (LoD) (**Figure 2A, Extended Figure 1A**). Reactivity against spikes from seasonal  $\alpha$ -  
85 CoVs, NL63 and 229E was also found. Similar to data shown in **Figure 1S and T**, reactivity to NL63 was  
86 much lower than for 229E. For sera from SARS-CoV-2 convalescent individuals, we observed strong  
87 reactivity to SARS-CoV-2 spikes with elevated reactivity to spikes of many  $\beta$ -CoV with the exception of the  
88 nobecovirus spikes from GCCDC1 and HKU9 (**Figure 2B**). Sera from several study participants (44% and  
89 56% respectively) even had detectible reactivity to the  $\gamma$ -CoV spike of HKU15 and  $\delta$ -CoV spike of HKU22  
90 (**Extended Figure 1B**). By receiving two or three doses of COVID-19 mRNA vaccines the reactivity pattern  
91 changed slightly. With two doses of the vaccine, higher reactivity to  $\beta$ -CoV spikes could be observed  
92 (**Figure 2C**). With three doses of the mRNA vaccine, high and relatively uniform reactivity to sarbecoviruses  
93 can be measured (**Figure 2D**). In addition, the percentage of individuals who had detectible reactivity in  
94 the 2x and 3x mRNA vaccinated groups was high across all tested spikes (**Extended Figure 1C and D**). Sera  
95 from people who had received three vaccine doses cross-reacted with all spikes except the spikes of the  
96 the nobecoviruses GCCDC1 and HKU9 and the  $\gamma$ -CoV spike of HKU15 and to the  $\delta$ -CoV of HKU22 where  
97 about approximately 20-55% of individuals had reactivity (**Extended Figure 1D**). Similarly strong reactivity  
98 across the board was also detected in individuals who had been infected and then vaccinated 2x or 3x  
99 with COVID-19 mRNA vaccines (**Figures 2E and F, Extended Figure 1E and F**).

100 Several of our observations from these experiments are interesting. Even in pre-COVID-19 sera, the  
101 prevalence and titers against the spike of  $\beta$ -CoV BCoV are almost as high as against the spike of seasonal  
102  $\beta$ -CoV OC43. This indicates an antigenic relatedness of the BCoV and OC43 spikes. It has been  
103 hypothesized that OC43 shares a common ancestor with BCoV and may have split off around 1890 [6].  
104 This split would coincide with the 'Russian flu' pandemic of 1889/1890 and it has been hypothesized that  
105 this pandemic was, indeed, caused by an OC43 ancestor which jumped from cattle into humans [7]. The  
106 crossreactivity found may perhaps further support this hypothesis and also explain why zoonotic  
107 infections in humans with BCoV are rare even though the virus can infect children [8]. In addition, the  
108 titers as well as the percentage of positive individuals for the seasonal  $\alpha$ -CoV 229E are much higher than  
109 for the seasonal  $\alpha$ -CoV NL63. These differences may point perhaps to an inherent difference in  
110 immunogenicity, antibody durability or represent an artifact of the protein used in the ELISA.  
111 Furthermore, from our longitudinal sample set, we noted that COVID-19 mRNA vaccination induces  
112 antibodies to diverse spike proteins including many  $\beta$ -CoVs spikes as well as  $\delta$ -CoV spikes. As previously  
113 reported, backboosting to OC43 and HKU (and BCoV) was also observed [9, 10], but little to no induction  
114 of antibodies was seen against  $\alpha$ -CoV spikes, the tested  $\gamma$ -CoV spike or the spikes from the nobecoviruses  
115 subgenus of the  $\beta$ -CoV. At a cross-sectional level we observed that sera from individuals infected with  
116 SARS-CoV-2 already show relatively broad reactivity across  $\beta$ -CoVs spikes with about half of the individuals  
117 having also some reactivity to  $\delta$ -CoV and  $\gamma$ -CoV spikes. COVID-19 mRNA vaccination induced similar  
118 crossreactivity. However, especially after three vaccine doses, there seems to be a bias towards  
119 sarbecoviruses with a clear drop towards other non-seasonal  $\beta$ -CoV spikes. It is important to note that  
120 after mRNA vaccination with the original vaccine containing the ancestral SARS-CoV-2 spike, titers against  
121 diverse sarbecovirus spikes are as high as against the Omicron spike. This may suggest, that the protection  
122 from severe disease that we observe against Omicron sublineages perhaps also applies to other, diverse  
123 sabecoviruses (e.g., SARS-CoV-1, HKU3-8, SX2013, BM48-31) which may (re)-emerge in the future as  
124 human pathogens. While these cross-reactive antibodies may not neutralize more distantly related  
125 viruses, they may still afford protection via Fc-mediated effector functions.

126 Another interesting aspect is the question of which epitopes these crossreactive antibodies target.  
127 Crossreactivity within the sarbecoviruses likely targets the receptor binding domain RBD but also different  
128 epitopes on the S2 subunit. Cross-reactivity to other  $\beta$ -CoV spikes is likely mediated mostly by S2 targeting  
129 antibodies since the receptor binding domain (RBD) is probably too divergent. Such antibodies have been  
130 isolated with some of them having neutralizing activity although at low potency [9, 11-13]. Finally,

131 crossreactivity to  $\alpha$ -CoV,  $\delta$ -CoVs and  $\gamma$ -CoVs is likely due to more rare antibodies that target the fusion  
132 peptide in the S2 domain. These antibodies have also been isolated and they exert neutralizing activity to  
133 some extent [14, 15]. However, it would be helpful to isolate more mAbs with different reactivity profiles  
134 to understand their characteristics better and determine if they indeed can contribute to protection *in*  
135 *vivo*. Of note, monoclonal antibody therapeutics and prophylactics have been very efficient treatment  
136 options for COVID-19, but antigenic changes of SARS-CoV-2 have rendered them irrelevant. Perhaps  
137 antibodies that target more conserved epitopes, even if they have lower neutralizing potency, could be a  
138 more sustainable solution.

139 In summary, we found a high prevalence of antibodies that crossreact to spike proteins from all four  
140 *Orthocoronavirinae* genera. It is entirely possible that the global population, which is hyperimmunized to  
141 SARS-CoV-2 through infection and vaccination, has now build more resistance to the many members  
142 coronavirus family in general.

143

144

145 **Acknowledgements**

146 We thank all the participants of our longitudinal PARIS study for their generous and continued support of  
147 research. We would like to thank Dr. D. Noah Sather from the University of Washington for providing the  
148 Beta and BA.1 spike protein used in this study and Drs. Kizzmekia Corbett and Barney Graham for providing  
149 229E, NL63, HKU1 and OC43 constructs. This effort was supported by the Serological Sciences Network  
150 (SeroNet) in part with Federal funds from the National Cancer Institute, National Institutes of Health,  
151 under Contract No. 75N91019D00024, Task Order No. 75N91021F00001. The content of this publication  
152 does not necessarily reflect the views or policies of the Department of Health and Human Services, nor  
153 does mention of trade names, commercial products or organizations imply endorsement by the U.S.  
154 Government. This work was also partially funded by the Centers of Excellence for Influenza Research and  
155 Surveillance (CEIRS, contract # HHSN272201400008C), the Centers of Excellence for Influenza Research  
156 and Response (CEIRR, contract # 75N93021C00014), by the Collaborative Influenza Vaccine Innovation  
157 Centers (CIVICs contract # 75N93019C00051) and by institutional funds.

158 **Conflict of interest statement**

159 The Icahn School of Medicine at Mount Sinai has filed patent applications relating to SARS-CoV-2  
160 serological assays and NDV-based SARS-CoV-2 vaccines which list Florian Krammer as co-inventor. Dr.  
161 Simon is also listed on the SARS-CoV-2 serological assays patent. Mount Sinai has spun out a company,  
162 Kantaro, to market serological tests for SARS-CoV-2. Florian Krammer has consulted for Merck and Pfizer  
163 (before 2020), and is currently consulting for Pfizer, Seqirus, 3rd Rock Ventures and Avimex and he is a  
164 co-founder and scientific advisory board member of CastleVax. The Krammer laboratory is also  
165 collaborating with Pfizer on animal models of SARS-CoV-2.

166

167 **References**

- 168 [1] Krammer F, Srivastava K, Alshammary H, Amoako AA, Awawda MH, Beach KF, et al. Antibody  
169 Responses in Seropositive Persons after a Single Dose of SARS-CoV-2 mRNA Vaccine. *N Engl J Med*. 2021.  
170 [2] Wajnberg A, Amanat F, Firpo A, Altman DR, Bailey MJ, Mansour M, et al. Robust neutralizing  
171 antibodies to SARS-CoV-2 infection persist for months. *Science*. 2020;370:1227-30.  
172 [3] Carreño JM, Alshammary H, Tcheou J, Singh G, Raskin A, Kawabata H, et al. Activity of convalescent  
173 and vaccine serum against SARS-CoV-2 Omicron. *Nature*. 2021.  
174 [4] Feikin DR, Abu-Raddad LJ, Andrews N, Davies MA, Higdon MM, Orenstein WA, et al. Assessing  
175 vaccine effectiveness against severe COVID-19 disease caused by omicron variant. Report from a  
176 meeting of the World Health Organization. *Vaccine*. 2022;40:3516-27.  
177 [5] Amanat F, Stadlbauer D, Strohmeier S, Nguyen THO, Chromikova V, McMahon M, et al. A serological  
178 assay to detect SARS-CoV-2 seroconversion in humans. *Nat Med*. 2020.  
179 [6] Vijgen L, Keyaerts E, Moës E, Thoelen I, Wollants E, Lemey P, et al. Complete genomic sequence of  
180 human coronavirus OC43: molecular clock analysis suggests a relatively recent zoonotic coronavirus  
181 transmission event. *J Virol*. 2005;79:1595-604.  
182 [7] Brüssow H, Brüssow L. Clinical evidence that the pandemic from 1889 to 1891 commonly called the  
183 Russian flu might have been an earlier coronavirus pandemic. *Microb Biotechnol*. 2021;14:1860-70.  
184 [8] Zhang XM, Herbst W, Kousoulas KG, Storz J. Biological and genetic characterization of a  
185 hemagglutinating coronavirus isolated from a diarrhoeic child. *J Med Virol*. 1994;44:152-61.  
186 [9] Amanat F, Thapa M, Lei T, Ahmed SMS, Adelsberg DC, Carreño JM, et al. SARS-CoV-2 mRNA  
187 vaccination induces functionally diverse antibodies to NTD, RBD, and S2. *Cell*. 2021;184:3936-48.e10.  
188 [10] Aydillo T, Rombauts A, Stadlbauer D, Aslam S, Abelenda-Alonso G, Escalera A, et al. Immunological  
189 imprinting of the antibody response in COVID-19 patients. *Nat Commun*. 2021;12:3781.  
190 [11] Zhou P, Song G, Liu H, Yuan M, He WT, Beutler N, et al. Broadly neutralizing anti-S2 antibodies  
191 protect against all three human betacoronaviruses that cause deadly disease. *Immunity*. 2023;56:669-  
192 86.e7.  
193 [12] Pinto D, Sauer MM, Czudnochowski N, Low JS, Tortorici MA, Housley MP, et al. Broad  
194 betacoronavirus neutralization by a stem helix-specific human antibody. *Science*. 2021;373:1109-16.  
195 [13] Song G, He WT, Callaghan S, Anzanello F, Huang D, Ricketts J, et al. Cross-reactive serum and  
196 memory B-cell responses to spike protein in SARS-CoV-2 and endemic coronavirus infection. *Nat*  
197 *Commun*. 2021;12:2938.  
198 [14] Dacon C, Tucker C, Peng L, Lee CD, Lin TH, Yuan M, et al. Broadly neutralizing antibodies target the  
199 coronavirus fusion peptide. *Science*. 2022;377:728-35.  
200 [15] Low JS, Jerak J, Tortorici MA, McCallum M, Pinto D, Cassotta A, et al. ACE2-binding exposes the  
201 SARS-CoV-2 fusion peptide to broadly neutralizing coronavirus antibodies. *Science*. 2022;377:735-42.  
202 [16] Stadlbauer D, Amanat F, Chromikova V, Jiang K, Strohmeier S, Arunkumar GA, et al. SARS-CoV-2  
203 Seroconversion in Humans: A Detailed Protocol for a Serological Assay, Antigen Production, and Test  
204 Setup. *Curr Protoc Microbiol*. 2020;57:e100.  
205 [17] Pallesen J, Wang N, Corbett KS, Wrapp D, Kirchdoerfer RN, Turner HL, et al. Immunogenicity and  
206 structures of a rationally designed prefusion MERS-CoV spike antigen. *Proc Natl Acad Sci U S A*.  
207 2017;114:E7348-E57.  
208 [18] Simon V, Kota V, Bloomquist RF, Hanley HB, Forgacs D, Pahwa S, et al. PARIS and SPARTA: Finding  
209 the Achilles' Heel of SARS-CoV-2. *mSphere*. 2022;7:e0017922.  
210 [19] Yeager CL, Ashmun RA, Williams RK, Cardellicchio CB, Shapiro LH, Look AT, et al. Human  
211 aminopeptidase N is a receptor for human coronavirus 229E. *Nature*. 1992;357:420-2.

- 212 [20] Hofmann H, Pirc K, van der Hoek L, Geier M, Berkhout B, Pöhlmann S. Human coronavirus NL63  
213 employs the severe acute respiratory syndrome coronavirus receptor for cellular entry. *Proc Natl Acad*  
214 *Sci U S A*. 2005;102:7988-93.
- 215 [21] Letko M, Marzi A, Munster V. Functional assessment of cell entry and receptor usage for SARS-CoV-  
216 2 and other lineage B betacoronaviruses. *Nat Microbiol*. 2020;5:562-9.
- 217 [22] Li W, Moore MJ, Vasilieva N, Sui J, Wong SK, Berne MA, et al. Angiotensin-converting enzyme 2 is a  
218 functional receptor for the SARS coronavirus. *Nature*. 2003;426:450-4.
- 219 [23] Wells HL, Letko M, Lasso G, Ssebide B, Nziza J, Byarugaba DK, et al. The evolutionary history of ACE2  
220 usage within the coronavirus subgenus. *Virus Evol*. 2021;7:veab007.
- 221 [24] Raj VS, Smits SL, Provacia LB, van den Brand JM, Wiersma L, Ouwendijk WJ, et al. Adenosine  
222 deaminase acts as a natural antagonist for dipeptidyl peptidase 4-mediated entry of the Middle East  
223 respiratory syndrome coronavirus. *J Virol*. 2014;88:1834-8.
- 224 [25] Woo PC, Lau SK, Li KS, Tsang AK, Yuen KY. Genetic relatedness of the novel human group C  
225 betacoronavirus to *Tylonycteris* bat coronavirus HKU4 and *Pipistrellus* bat coronavirus HKU5. *Emerg*  
226 *Microbes Infect*. 2012;1:e35.
- 227 [26] Yang Y, Du L, Liu C, Wang L, Ma C, Tang J, et al. Receptor usage and cell entry of bat coronavirus  
228 HKU4 provide insight into bat-to-human transmission of MERS coronavirus. *Proc Natl Acad Sci U S A*.  
229 2014;111:12516-21.
- 230 [27] Woo PC, Wang M, Lau SK, Xu H, Poon RW, Guo R, et al. Comparative analysis of twelve genomes of  
231 three novel group 2c and group 2d coronaviruses reveals unique group and subgroup features. *J Virol*.  
232 2007;81:1574-85.
- 233 [28] Corman VM, Ithete NL, Richards LR, Schoeman MC, Preiser W, Drosten C, et al. Rooting the  
234 phylogenetic tree of middle East respiratory syndrome coronavirus by characterization of a conspecific  
235 virus from an African bat. *J Virol*. 2014;88:11297-303.
- 236 [29] Xiong Q, Cao L, Ma C, Tortorici MA, Liu C, Si J, et al. Close relatives of MERS-CoV in bats use ACE2 as  
237 their functional receptors. *Nature*. 2022;612:748-57.
- 238 [30] Huang C, Liu WJ, Xu W, Jin T, Zhao Y, Song J, et al. A Bat-Derived Putative Cross-Family Recombinant  
239 Coronavirus with a Reovirus Gene. *PLoS Pathog*. 2016;12:e1005883.
- 240 [31] Wu Z, Yang L, Ren X, Zhang J, Yang F, Zhang S, et al. ORF8-Related Genetic Evidence for Chinese  
241 Horseshoe Bats as the Source of Human Severe Acute Respiratory Syndrome Coronavirus. *J Infect Dis*.  
242 2016;213:579-83.
- 243 [32] Schultze B, Herrler G. Recognition of cellular receptors by bovine coronavirus. *Arch Virol Suppl*.  
244 1994;9:451-9.
- 245 [33] Hulswit RJG, Lang Y, Bakkers MJG, Li W, Li Z, Schouten A, et al. Human coronaviruses OC43 and  
246 HKU1 bind to 9-. *Proc Natl Acad Sci U S A*. 2019;116:2681-90.
- 247 [34] Yuan Y, Zu S, Zhang Y, Zhao F, Jin X, Hu H. Porcine Deltacoronavirus Utilizes Sialic Acid as an  
248 Attachment Receptor and Trypsin Can Influence the Binding Activity. *Viruses*. 2021;13.
- 249 [35] Wang L, Maddox C, Terio K, Lanka S, Fredrickson R, Novick B, et al. Detection and Characterization  
250 of New Coronavirus in Bottlenose Dolphin, United States, 2019. *Emerg Infect Dis*. 2020;26:1610-2.

251

252



## 253 **Online Methods**

### 254 **Recombinant proteins expression**

255 Mammalian expression vectors encoding the ectodomain of spike proteins from SARS-CoV-1 (GenBank:  
256 875 AAP13441.1), SARS-CoV-2 (GenBank: MN908947.3), HKU3-8 (GenBank: ADE34766.1), SX2013  
257 (GenBank: AIA62300.1), BM48-31(GenBank: YP\_003858584.1), SARS-CoV-2 Omicron (GenBank:  
258 UFT26501.1), MERS-CoV (GenBank: AXP07355.1), HKU4 (GenBank: YP\_001039953.1), HKU5 (GenBank:  
259 YP\_001039962.1), HKU9 (YP\_001039971.1), GCCDC1 (GenBank: QKF94914.1), Zhejiang2013, bat Hp  
260 (GenBank: YP\_009072440.1) HKU15 (GenBank: YP\_009513021.1), HKU22 (GenBank: AHB63508.1), BCoV,  
261 bovine coronavirus (GenBank: AAA66399.1), Neo CoV, Coronavirus Neoromicia (Genbank: AGY29650.2),  
262 229E (Genbank: NP\_073551.1), NL63 (GenBank AFV53148.1), OC43 (Genbank: KF963240.1) and HKU1  
263 (Genbank: AGW27881.1) (see **Supplementary Table 1** for more information on virus isolates, host and  
264 receptor) with a C-terminal thrombin cleavage site, T4 foldon trimerization domain and hexahistidine tag  
265 were constructed as described earlier [5, 16]. The constructs also contain the “2P” stabilizing mutations  
266 [17] and known or putative S1-S2 cleavage sites were removed. Proteins were purified from transiently-  
267 transfected Expi293F cells with each respective plasmid. Cell-free supernatant was harvested after 3 days  
268 post transfection and his-tagged proteins were purified by gravity chromatography using Ni<sup>2+</sup>-nitriloacetic  
269 acid (NTA) agarose (Qiagen). Proteins were eluted and buffer was exchanged using Amicon centrifugal  
270 units (EMD Millipore) and all recombinant proteins were finally re-suspended in phosphate buffered saline  
271 (PBS) as described [16]. Proteins were run on sodium dodecyl sulfate polyacrylamide gel electrophoresis  
272 (SDS-PAGE) gels under reducing conditions for quality control and stored at -80°C until use.

### 273 **ELISA**

274 Antibody titers in in serum samples were assessed using a research grade ELISA [5, 16] using recombinant  
275 versions of full-length spike (S) proteins of different coronaviruses. Briefly, Immulon 4 HBX 96-well  
276 microtiter plates (Thermo Fisher Scientific) were coated overnight at 4 °C with 50 µl per well of a 2 µg/ml  
277 solution of each respective recombinant protein resuspended in PBS (Gibco; cat. no. 10010-031). The  
278 next morning, plates were washed 3 times with PBS supplemented with 0.1% Tween-20 using an  
279 automatic plate washer (BioTek 405TS microplate washer) and blocked with 200 µl per well of PBST  
280 containing 3% milk powder (AmericanBio) for 1 h at room temperature (RT). Blocking solution was  
281 removed, and initial dilutions (1:100) of heat-inactivated serum (in PBS-T 1% milk powder) were added to  
282 the plates, followed by 2-fold serial dilutions and 2h incubation at RT. Next, plates were washed three  
283 times with PBS-T and 50 µl per well of the pre-diluted secondary anti-human IgG (Fab-specific) horseradish  
284 peroxidase (HRP) antibody (produced in goat; Sigma-Aldrich, cat. no. A0293, RRID: AB\_257875) diluted  
285 1:9,000 in PBS-T containing 1% milk powder were added for 1 h. Plates were again washed three times  
286 with 0.1% PBST, the substrate o-phenylenediamine dihydrochloride (OPD) (SIGMAFAST) was added (100  
287 µl per well) for 10 min, followed by an addition of 3M hydrochloric acid (50 µl per well; Thermo Fisher  
288 Scientific) to stop the reaction. Optical density (OD) was measured at a wavelength of 490 nm using a  
289 plate reader (BioTek, Synergy H1 microplate reader). The area under the curve (AUC) values were  
290 calculated and plotted using Prism 9 software (GraphPad).

### 291 **Human serum samples**

292 Human serum samples were obtained from study participants in the longitudinal observational Protection  
293 Associated with Rapid Immunity to SARS-CoV-2 (PARIS) study [18]. This cohort follows health care workers  
294 longitudinally since April 2020. The study was reviewed and approved by the Icahn school of Medicine at  
295 Mount Sinai Institutional Review Board (IRB-20-03374). All participants provided informed consent and  
296 HIPAA Authorization prior to sample and data collection. All participants provided permission for sample

297 banking and sharing. The participants did not receive compensation. All biospecimen were coded and  
 298 stored at  $-80^{\circ}\text{C}$ .

299 We used longitudinal serum samples collected from 20 adult study participants. 10/20 of the study  
 300 participants (50%) were infected with SARS-CoV-2 prior to the first vaccine dose and were seropositive  
 301 prior to vaccination (pre-infected group). 10/20 study participants (50%) had no previous SARS-CoV-2  
 302 infection history and were seronegative for SARS-CoV-2 antibodies prior to vaccination (naive group).  
 303 Participants received two doses of either the Moderna mRNA-1273 vaccine or the Pfizer-BioNTech  
 304 BNT162b2 vaccine. Demographics of seropositive and seronegative study participants and sample  
 305 collection time points from each individual are summarized in **Supplementary Table 2**.

306 For the antigenic landscape characterization against various coronaviruses, we selected 85 serum samples  
 307 from 54 participants. 20 out of 54 participants were seronegative prior to vaccination while 34/54 had  
 308 COVID-19 prior to vaccination. All participants with pre-vaccination immunity were infected in 2020 when  
 309 only ancestral SARS-CoV-2 strains circulated in the New York metropolitan area. Convalescent samples  
 310 ( $n = 15$ ) were obtained within three months of SARS-CoV-2 infection (average: 58 days, range: 23–87 days)  
 311 whereas the post-vaccination samples were collected on average 23 days (range: 14–39 days) after the  
 312 second dose [ $n = 40$ ; where  $n = 20$  Pfizer  $2\times$  (10 individuals with prior infection and 10 individuals with no  
 313 infection) and  $n = 20$  Moderna  $2\times$  (10 individuals with prior infection and 10 individuals with no infection)]  
 314 or 19 days (range: 14–33 days) after the third booster [ $n = 30$ ; 20 Pfizer  $3\times$  (10 individuals with prior  
 315 infection and 10 individuals with no infection) and 10 Moderna  $3\times$ ) vaccine dose. Pre-pandemic human  
 316 serum samples were collected before the COVID-19 pandemic. Demographics of participants and sample  
 317 collection time points from each individual are summarized in **Supplementary Table 3**.

318

### 319 **Supplementary Tables**

#### 320 **Supplementary Table 1. Information on the viral isolates used for recombinant spike protein** 321 **generation.**

| Virus      | Genus (subgenus)            | Accession # | Host Species               | Receptor                               | Reference |
|------------|-----------------------------|-------------|----------------------------|----------------------------------------|-----------|
| 229E       | $\alpha$ -CoV               | NP_073551.1 | <i>Homo sapiens</i>        | Human aminopeptidase N (APN)           | [19]      |
| NL63       | $\alpha$ -CoV               | AFV53148.1  | <i>Homo sapiens</i>        | Angiotensin converting enzyme 2 (ACE2) | [20]      |
| SARS CoV-2 | $\beta$ -CoV (sarbecovirus) | MN908947.3  | <i>Homo sapiens</i>        | ACE2                                   | [21]      |
| SARS-CoV-1 | $\beta$ -CoV (sarbecovirus) | AAP13441.1  | Several species            | ACE2                                   | [22]      |
| HKU3-8     | $\beta$ -CoV (sarbecovirus) | ADE34766.1  | <i>Rhinolophus</i> species |                                        | [23]      |

|                                                     |                                |                |                                  |                                                 |          |
|-----------------------------------------------------|--------------------------------|----------------|----------------------------------|-------------------------------------------------|----------|
| BM48-31                                             | $\beta$ -CoV<br>(sarbecovirus) | YP_003858584.1 | <i>Rhinolophus blasii</i>        |                                                 | [23]     |
| SX2013                                              | $\beta$ -CoV<br>(sarbecovirus) | AIA62300.1     | <i>Rhinolophus ferrumequinum</i> |                                                 | [23]     |
| MERS CoV                                            | $\beta$ -CoV<br>(merbecovirus) | AXP07355.1     | Camelus dromedariu               | Dipeptidyl peptidase 4 (DPP4)                   | [24]     |
| HKU4                                                | $\beta$ -CoV<br>(merbecovirus) | YP_001039953.1 | <i>Tylonycteris</i> species      | DDP4                                            | [25, 26] |
| HKU5                                                | $\beta$ -CoV<br>(merbecovirus) | YP_001039962.1 | <i>Pipistrellus</i> species      |                                                 | [25, 27] |
| NeoCoV                                              | $\beta$ -CoV<br>(merbecovirus) | AGY29650.2     | Neoromicia capensis              | ACE2                                            | [28, 29] |
| HKU9                                                | $\beta$ -CoV<br>(nobecovirus)  | YP_001039971.1 | <i>Rousettus leschenaulti</i>    |                                                 | [27]     |
| GCCDC 1                                             | $\beta$ -CoV<br>(nobecovirus)  | QKF94914.1     | <i>Rousettus leschenaulti</i>    |                                                 | [30]     |
| Zhejiang2013 (Bat Hp-beta coronavirus/Zhejiang2013) | $\beta$ -CoV<br>(hibecovirus)  | YP_009072440.1 | <i>Hipposideros pratti</i>       |                                                 | [31]     |
| BCoV                                                | $\beta$ -CoV<br>(embecovirus)  | AAA66399.1     | <i>Bovine</i> species            | N-acetyl-9-O-acetylneuraminic acid (Neu5,9Ac2). | [32]     |
| OC43                                                | $\beta$ -CoV<br>(embecovirus)  | KF963240.1     | <i>Homo sapiens sapiens</i>      | N-acetyl-9-O-acetylneuraminic acid (Neu5,9Ac2). | [33]     |
| HKU1                                                | $\beta$ -CoV<br>(embecovirus)  | AGW27881.1     | <i>Homo sapiens sapiens</i>      | N-acetyl-9-O-acetylneuraminic acid (Neu5,9Ac2). | [33]     |
| HKU15                                               | $\delta$ -CoV                  | YP_009513021.1 | <i>Sus scrofa</i>                | porcine aminopeptidase N (pAPN)                 | [34]     |

|       |       |            |                            |  |      |
|-------|-------|------------|----------------------------|--|------|
| HKU22 | γ-CoV | AHB63508.1 | <i>Tursiops</i><br>species |  | [35] |
|-------|-------|------------|----------------------------|--|------|

322

323

**Supplementary Table 2: Characteristics of individuals shown in Figure 1.**

| Participant ID | Age Bracket | Sex    | Time points included in this study | SARS CoV-2 infection prior to vaccination | Vaccine type |
|----------------|-------------|--------|------------------------------------|-------------------------------------------|--------------|
| Pluto-001      | 45-49       | Male   | Pre vaccine, Post-vax, Post-Boost  | Yes                                       | Pfizer       |
| Pluto-002      | 20-24       | Female | Pre vaccine, Post-vax, Post-Boost  | Yes                                       | Moderna      |
| Pluto-003      | 55-59       | Female | Pre vaccine, Post-vax, Post-Boost  | No                                        | Moderna      |
| Pluto-004      | 50-54       | Female | Pre vaccine, Post-vax, Post-Boost  | Yes                                       | Pfizer       |
| Pluto-005      | 40-44       | Female | Pre vaccine, Post-vax, Post-Boost  | No                                        | Moderna      |
| Pluto-006      | 35-39       | Female | Pre vaccine, Post-vax, Post-Boost  | No                                        | Pfizer       |
| Pluto-007      | 65-69       | Male   | Pre vaccine, Post-vax, Post-Boost  | No                                        | Moderna      |
| Pluto-008      | 50-54       | Female | Pre vaccine, Post-vax, Post-Boost  | Yes                                       | Pfizer       |
| Pluto-009      | 25-29       | Female | Pre vaccine, Post-vax, Post-Boost  | Yes                                       | Pfizer       |
| Pluto-0010     | 25-29       | Female | Pre vaccine, Post-vax, Post-Boost  | No                                        | Moderna      |
| Pluto-0011     | 60-64       | Male   | Pre vaccine, Post-vax, Post-Boost  | Yes                                       | Pfizer       |
| Pluto-0012     | 25-29       | Male   | Pre vaccine, Post-vax, Post-Boost  | No                                        | Moderna      |
| Pluto-0013     | 25-29       | Male   | Pre vaccine, Post-vax, Post-Boost  | Yes                                       | Pfizer       |
| Pluto-0014     | 35-39       | Female | Pre vaccine, Post-vax, Post-Boost  | Yes                                       | Moderna      |
| Pluto-0015     | 20-24       | Female | Pre vaccine, Post-vax, Post-Boost  | No                                        | Pfizer       |

|            |       |        |                                   |     |         |
|------------|-------|--------|-----------------------------------|-----|---------|
| Pluto-0016 | 25-29 | Female | Pre vaccine, Post-vax, Post-Boost | Yes | Pfizer  |
| Pluto-0017 | 40-44 | Female | Pre vaccine, Post-vax, Post-Boost | No  | Moderna |
| Pluto-0018 | 40-44 | Female | Pre vaccine, Post-vax, Post-Boost | No  | Pfizer  |
| Pluto-0019 | 30-34 | Female | Pre vaccine, Post-vax, Post-Boost | No  | Pfizer  |
| Pluto-0020 | 35-39 | Male   | Pre vaccine, Post-vax, Post-Boost | Yes | Moderna |

324

325 **Supplementary Table 3: Characteristics of individuals shown in Figure 2 and S Figure 1.**

326

| <b>Participant ID</b> | <b>Age Bracket</b> | <b>Sex</b> | <b>Time points included in this study</b> | <b>SARS CoV-2 infection prior to vaccination</b> | <b>Vaccine Type</b> |
|-----------------------|--------------------|------------|-------------------------------------------|--------------------------------------------------|---------------------|
| OMI-001               | 30-39              | Female     | Post-Vax, Post-Boost                      | No                                               | Moderna             |
| OMI-002               | 18-29              | Female     | Post-Vax, Post-Boost                      | No                                               | Moderna             |
| OMI-003               | 40-49              | Male       | Post-Vax, Post-Boost                      | No                                               | Moderna             |
| OMI-004               | 40-49              | Female     | Post-Vax, Post-Boost                      | No                                               | Moderna             |
| OMI-005               | 40-49              | Female     | Post-Vax, Post-Boost                      | No                                               | Moderna             |
| OMI-006               | 40-49              | Male       | Post-Vax, Post-Boost                      | No                                               | Moderna             |
| OMI-007               | 50-59              | Female     | Post-Vax, Post-Boost                      | No                                               | Moderna             |
| OMI-008               | 60-69              | Female     | Post-Vax, Post-Boost                      | No                                               | Moderna             |
| OMI-009               | 30-39              | Female     | Post-Vax, Post-Boost                      | No                                               | Moderna             |
| OMI-010               | 18-29              | Female     | Post-Vax, Post-Boost                      | No                                               | Moderna             |
| OMI-011               | 40-49              | Female     | Post-Vax, Post-Boost                      | No                                               | Pfizer              |
| OMI-012               | 18-29              | Female     | Post-Vax, Post-Boost                      | No                                               | Pfizer              |
| OMI-013               | 40-49              | Female     | Post-Vax, Post-Boost                      | No                                               | Pfizer              |
| OMI-014               | 50-59              | Female     | Post-Vax, Post-Boost                      | No                                               | Pfizer              |
| OMI-015               | 18-29              | Female     | Post-Vax, Post-Boost                      | No                                               | Pfizer              |
| OMI-016               | 70-79              | Male       | Post-Vax, Post-Boost                      | No                                               | Pfizer              |
| OMI-017               | 30-39              | Female     | Post-Vax, Post-Boost                      | No                                               | Pfizer              |
| OMI-018               | 30-39              | Female     | Post-Vax, Post-Boost                      | No                                               | Pfizer              |

|         |       |        |                          |     |         |
|---------|-------|--------|--------------------------|-----|---------|
| OMI-019 | 40-29 | Male   | Post-Vax, Post-Boost     | No  | Pfizer  |
| OMI-020 | 40-49 | Female | Post-Vax, Post-Boost     | No  | Pfizer  |
| OMI-021 | 40-49 | Female | Post-Infection, Post-Vax | Yes | Pfizer  |
| OMI-022 | 30-39 | Female | Post-Infection, Post-Vax | Yes | Pfizer  |
| OMI-023 | 30-39 | Female | Post-Infection, Post-Vax | Yes | Pfizer  |
| OMI-024 | 30-39 | Male   | Post-Infection, Post-Vax | Yes | Pfizer  |
| OMI-028 | 18-29 | Female | Post-Infection, Post-Vax | Yes | Moderna |
| OMI-029 | 30-39 | Female | Post-Infection, Post-Vax | Yes | Pfizer  |
| OMI-032 | 50-59 | Male   | Post-Infection, Post-Vax | Yes | Pfizer  |
| OMI-027 | 40-49 | Female | Post-Infection, Post-Vax | Yes | Pfizer  |
| OMI-033 | 30-39 | Female | Post-Infection, Post-Vax | Yes | Pfizer  |
| OMI-034 | 40-49 | Male   | Post-Infection, Post-Vax | Yes | Pfizer  |
| OMI-035 | 30-39 | Female | Post-Infection, Post-Vax | Yes | Pfizer  |
| OMI-025 | 50-59 | Male   | Post-Infection           | Yes | No vax  |
| OMI-026 | 30-39 | Male   | Post-Infection           | Yes | No vax  |
| OMI-030 | 40-49 | Female | Post-Infection           | Yes | No vax  |
| OMI-031 | 30-39 | Female | Post-Infection           | Yes | No vax  |
| OMI-036 | 50-59 | Male   | Post-Vax                 | Yes | Moderna |
| OMI-037 | 30-39 | Male   | Post-Vax                 | Yes | Moderna |
| OMI-038 | 18-29 | Male   | Post-Vax                 | Yes | Moderna |
| OMI-039 | 30-39 | Female | Post-Vax                 | Yes | Moderna |
| OMI-040 | 60-69 | Female | Post-Vax                 | Yes | Moderna |
| OMI-041 | 40-49 | Female | Post-Vax                 | Yes | Moderna |
| OMI-042 | 40-49 | Female | Post-Vax                 | Yes | Moderna |
| OMI-043 | 60-69 | Male   | Post-Vax                 | Yes | Moderna |
| OMI-044 | 40-49 | Male   | Post-Vax                 | Yes | Moderna |
| OMI-045 | 30-39 | Male   | Post-Boost               | Yes | Pfizer  |
| OMI-046 | 30-39 | Female | Post-Boost               | Yes | Pfizer  |
| OMI-047 | 50-59 | Female | Post-Boost               | Yes | Pfizer  |
| OMI-048 | 60-69 | Male   | Post-Boost               | Yes | Pfizer  |
| OMI-049 | 60-69 | Male   | Post-Boost               | Yes | Pfizer  |
| OMI-050 | 30-39 | Female | Post-Boost               | Yes | Pfizer  |

|         |       |        |            |     |        |
|---------|-------|--------|------------|-----|--------|
| OMI-051 | 50-59 | Female | Post-Boost | Yes | Pfizer |
| OMI-052 | 50-59 | Female | Post-Boost | Yes | Pfizer |
| OMI-053 | 18-29 | Female | Post-Boost | Yes | Pfizer |
| OMI-054 | 30-39 | Female | Post-Boost | Yes | Pfizer |

327

328

329

330 **Figure legends**

331 **Figure 1. Induction of antibodies to diverse *Orthocoronavirinae* spike proteins.** **A** shows a phylogenetic  
332 tree built with amino acid sequences of the spike proteins used in this study. The tree was built using  
333 Clustal Omega, visualized in FigTree and labels and highlighting was added in Microsoft Powerpoint. The  
334 scale bar indicates a 5% change in amino acid sequence. Accession numbers and full name of the different  
335 viruses strains used can be found in **Supplementary Table 1**. **B-D** Reactivity of longitudinal serum samples  
336 from naïve (black) or SARS-CoV-2 pre-infected (grey) individuals at a pre-vaccination time point, after the  
337 1<sup>st</sup> dose of COVID-19 mRNA vaccine and after the 2<sup>nd</sup> dose of COVID-19 mRNA against the ancestral spike  
338 of SARS-CoV-2, against the Beta variant spike and against the Omicron BA.1 variant spike. **C-R** shows  
339 reactivity to diverse  $\beta$ -CoV spikes, **S-T** shows reactivity to  $\alpha$ -CoV spikes, **U** shows reactivity to a  $\delta$ -CoV  
340 spike and **V** shows reactivity to a  $\gamma$ -CoV spike. N=10 per group. Subject characteristics can be found in  
341 **Supplemental Table 2**.

342  
343 **Figure 2. Cross-sectional reactivity of human sera from different exposure groups to diverse**  
344 ***Orthocoronavirinae* spike proteins.** **A** shows serum reactivity of pre-pandemic serum sample to different  
345 spike proteins (n=15). **B** shows serum reactivity of SARS-CoV-2 convalescent individuals to different spike  
346 proteins (n=16). **C** shows serum reactivity of individuals vaccinated 2x with COVID-19 mRNA vaccines, **D**  
347 shows serum reactivity of individuals who got three doses of vaccine (n=20 for each group) to different  
348 spike proteins. **E** and **F** show serum reactivity of individuals infected with SARS-CoV-2 and then vaccinated  
349 twice (n=20 except for SX2013 where n=19) or three times (n=9) to different spike proteins. Subject  
350 characteristics can be found in **Supplemental Table 3**.

351  
352 **Extended Figure 1: Percent of individuals with reactivity above the limit of detection (LoD) to different**  
353 **spike proteins for each group shown in Figure 1.** **A** shows percentage of pre-pandemic serum samples  
354 reactive to different spike proteins (n=15). **B** shows percentage of samples from SARS-CoV-2 convalescent  
355 individuals reactive to different spike proteins (n=16). **C** shows percentage of individuals vaccinated 2x  
356 with COVID-19 mRNA vaccines reactive to different spikes, **D** shows the same for individuals who got three  
357 doses of vaccine (n=20 for each group). **E** and **F** show percentage of individuals infected with SARS-CoV-2  
358 and then vaccinated twice (n=20 except for SX2013 where n=19) or three times (n=9) who had reactivity  
359 to different spike proteins. Subject characteristics can be found in **Supplemental Table 3**.

360

361



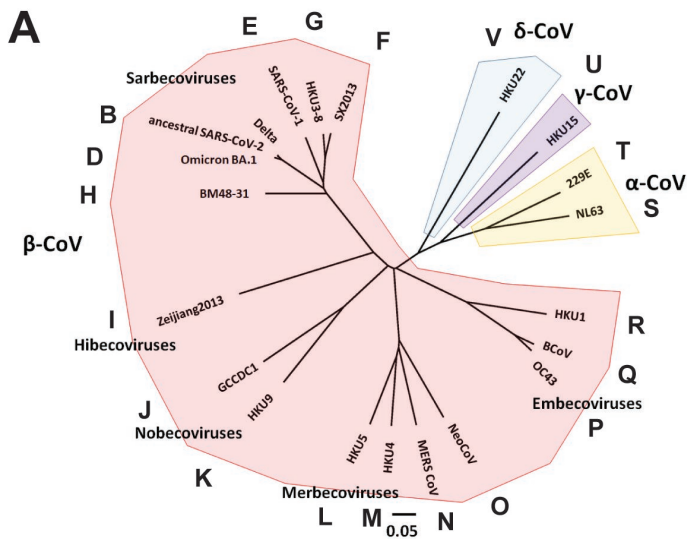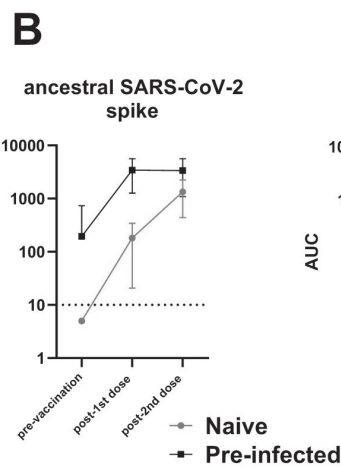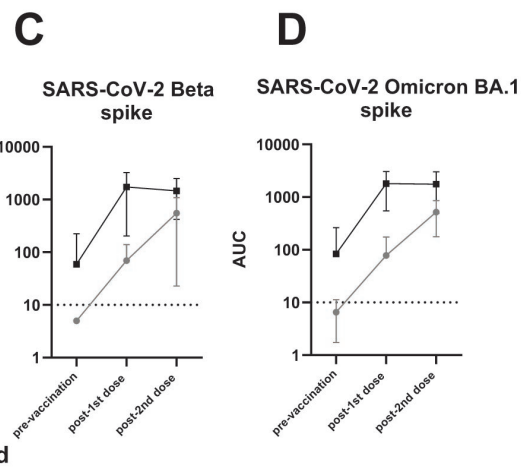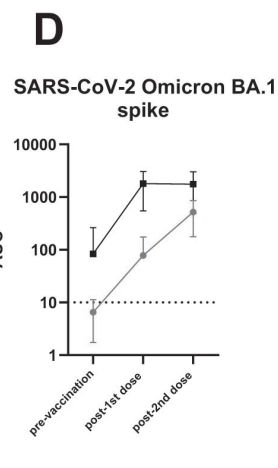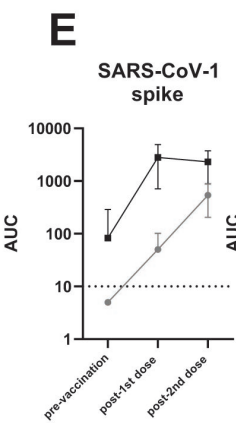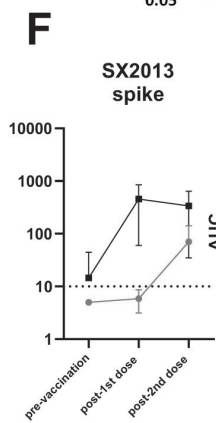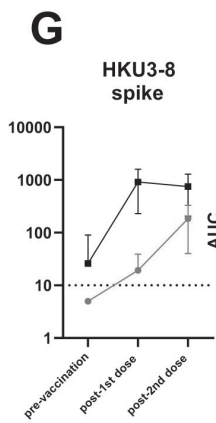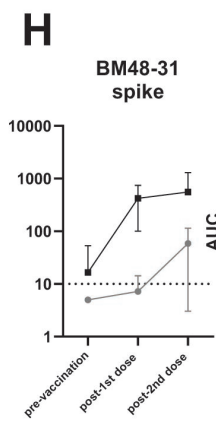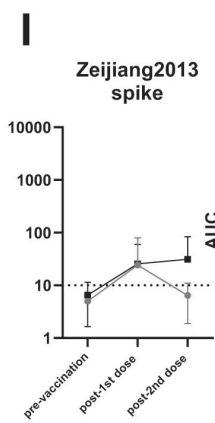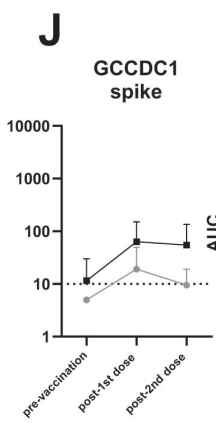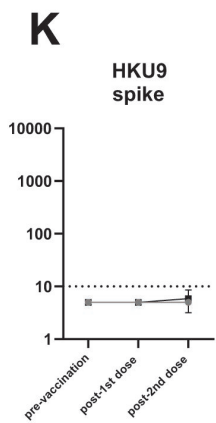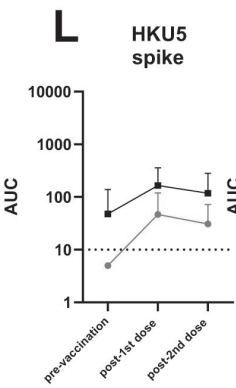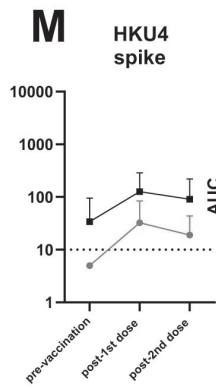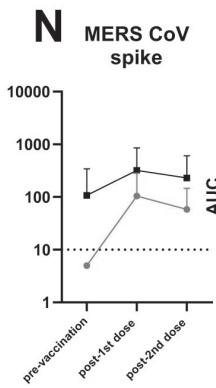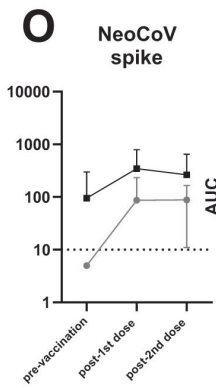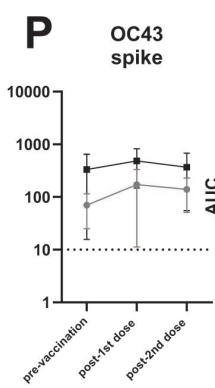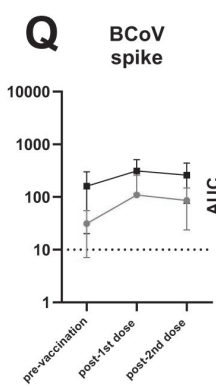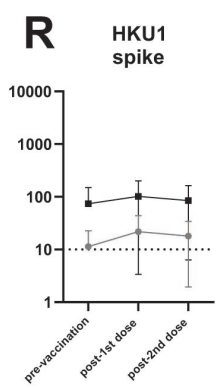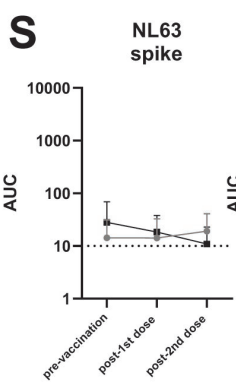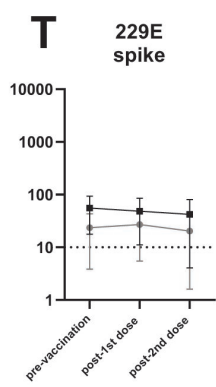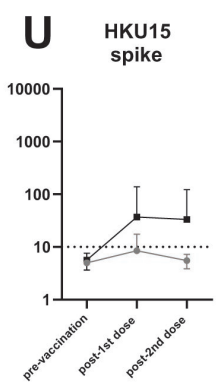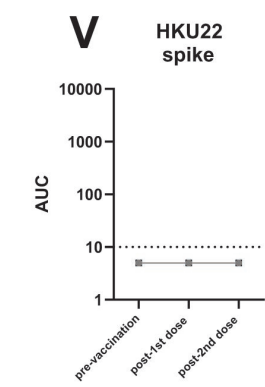

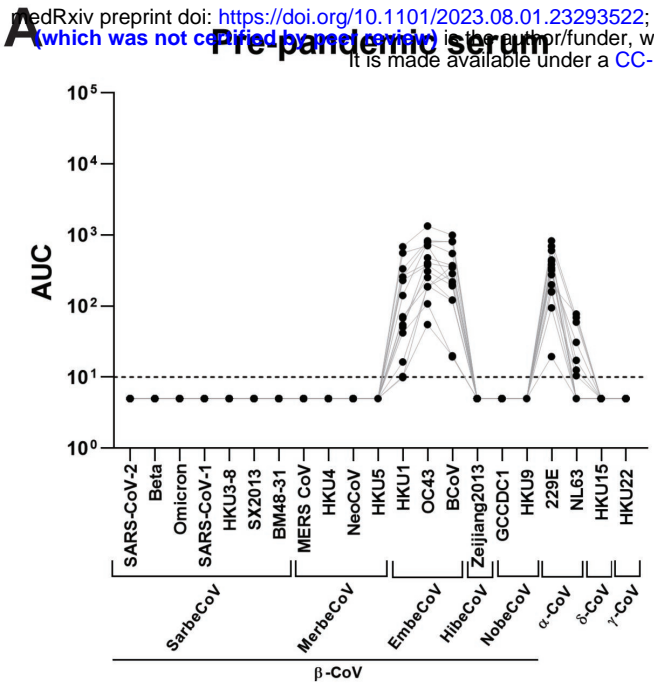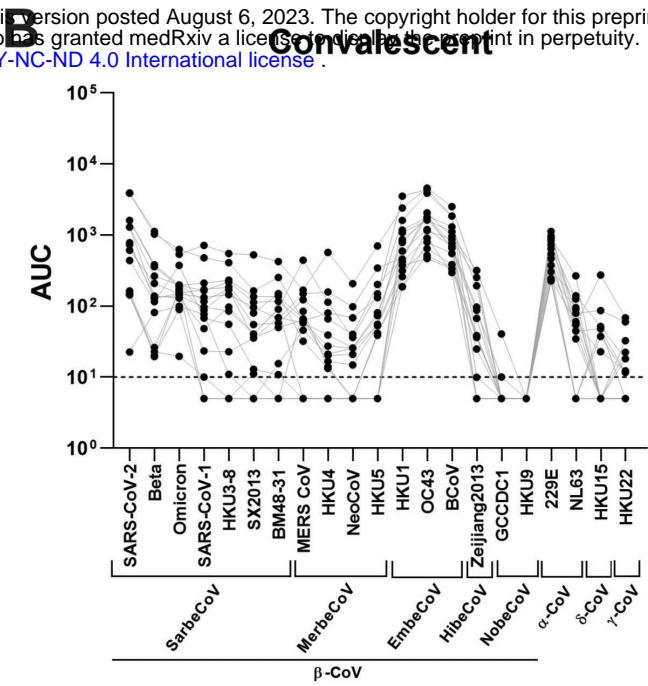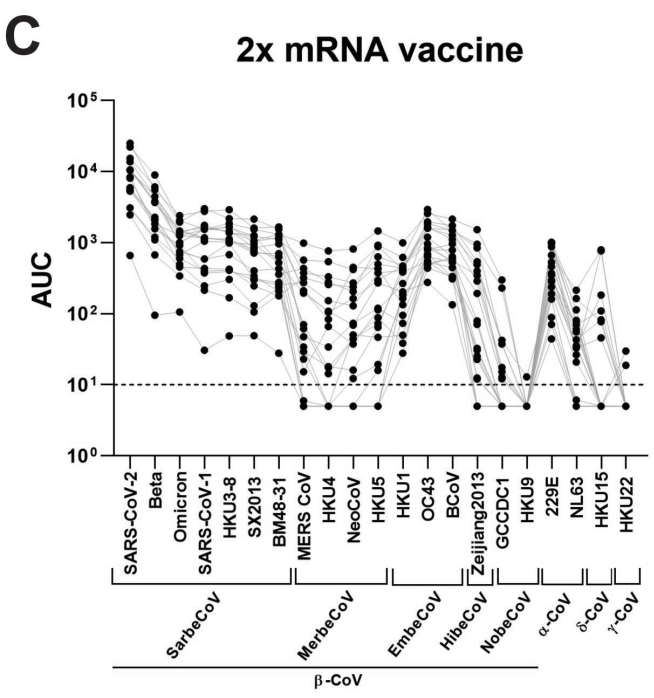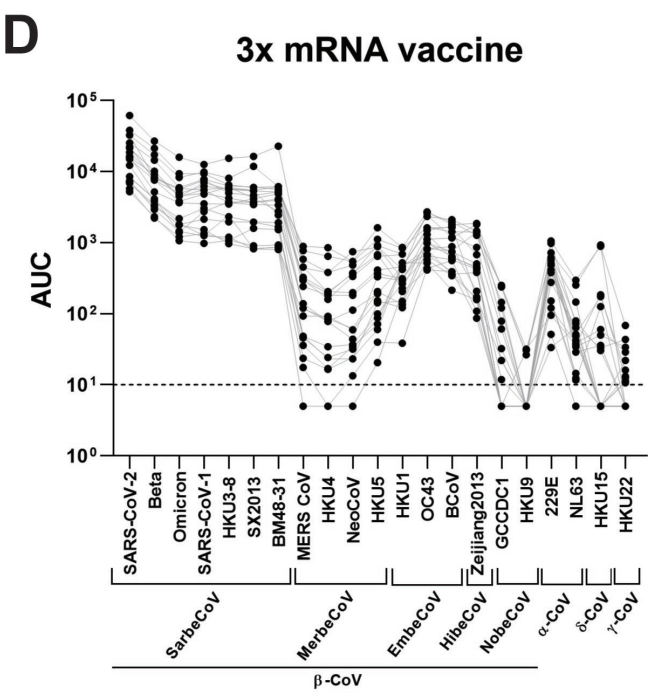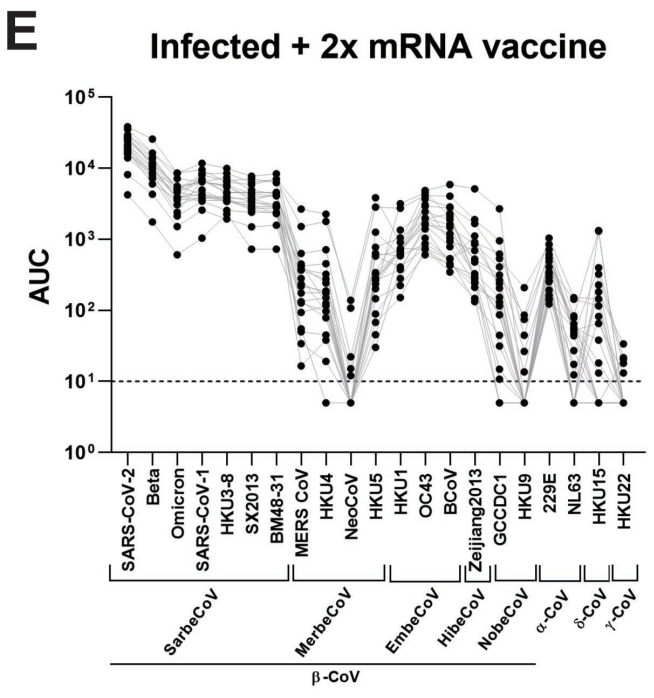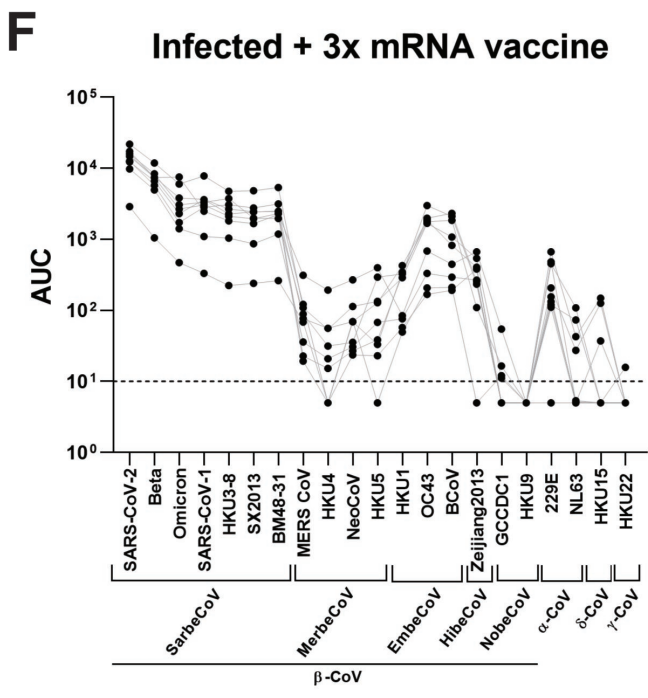

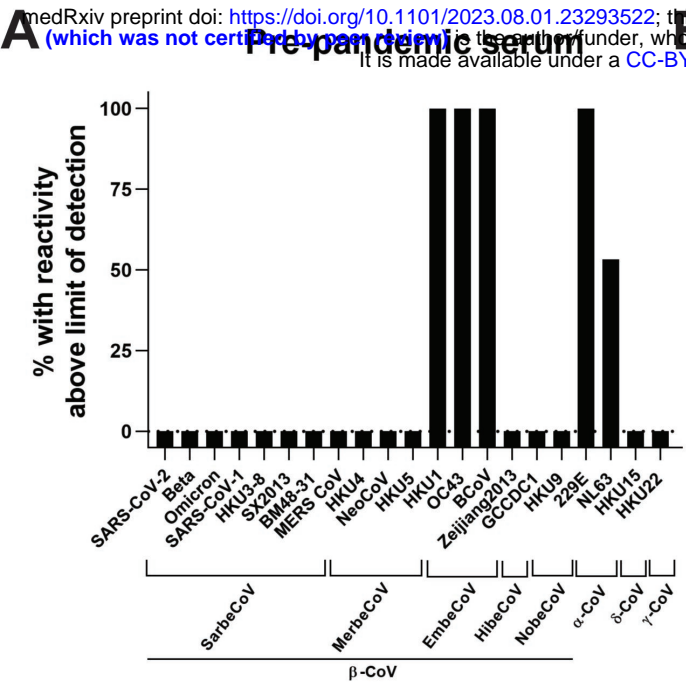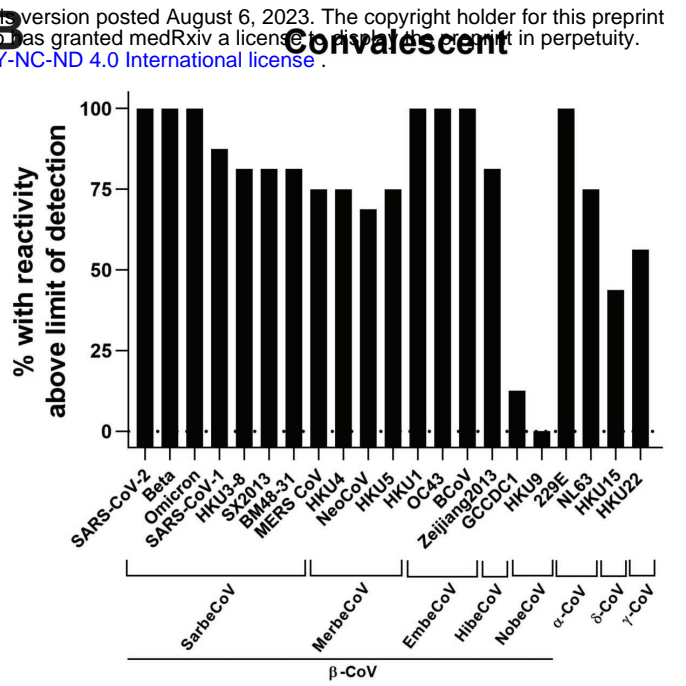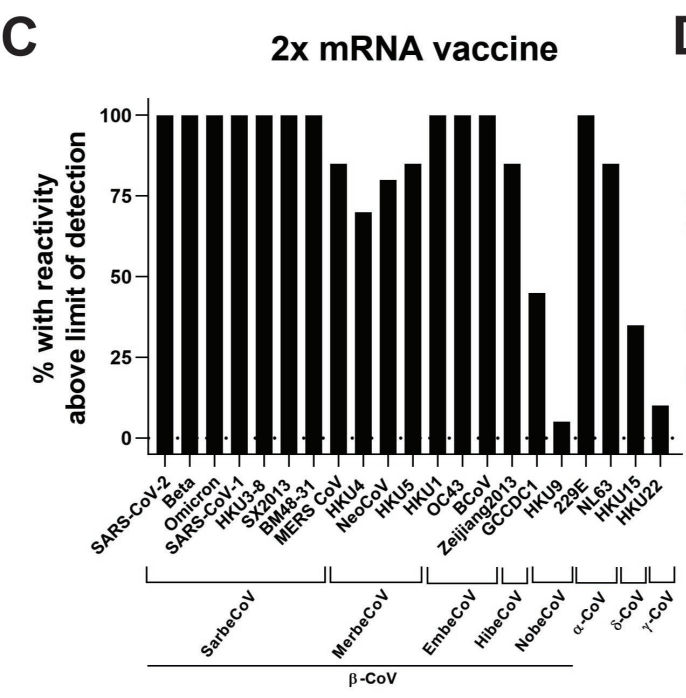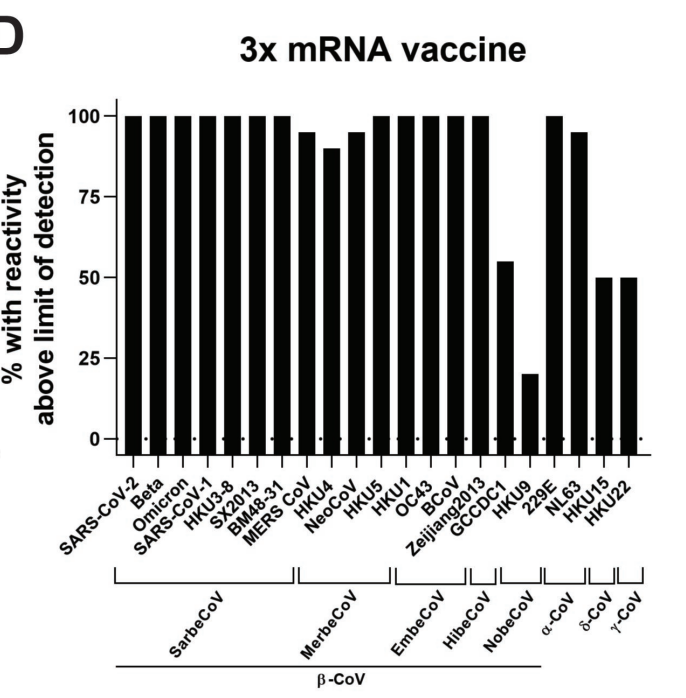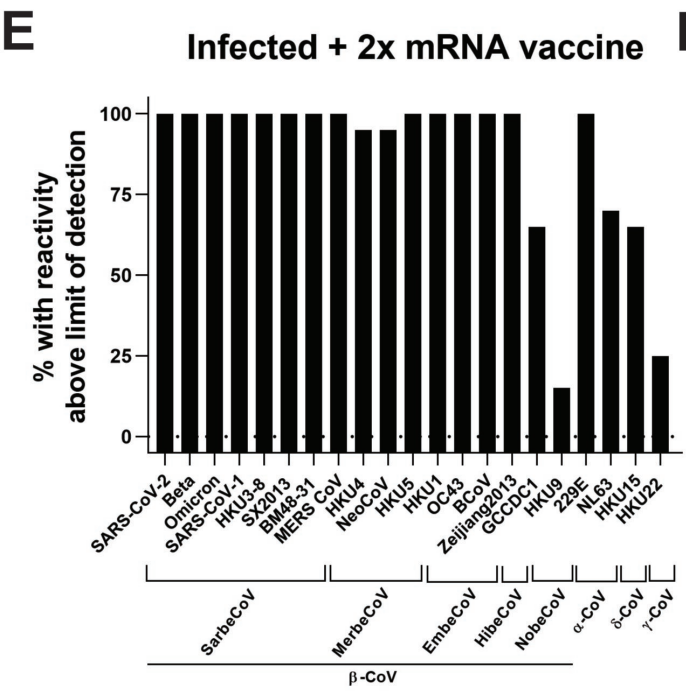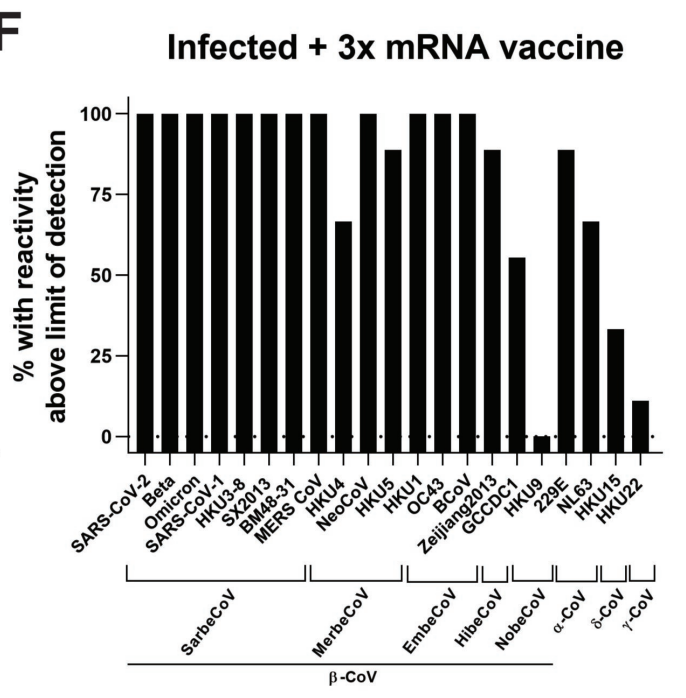

Source: https://medrxiv.org/content/medrxiv/early/2023/08/06/2023.08.01.23293522.full.pdf
